# Supplementary material
Source: PubMed Central journal article supplement (PMC5388816)
Supplement: JB.00075-17_zjb999094379s4.pdf [file JB.00075-17_zjb999094379s4.pdf]

**A putative O-linked  $\beta$ -N-acetylglucosamine transferase is essential for hormogonium development and motility in the filamentous cyanobacterium *Nostoc punctiforme*.**

Behzad Khayatan<sup>1</sup>, Divleen K. Bains<sup>1</sup>, Monica H. Cheng<sup>1</sup>, Ye Won Cho<sup>1</sup>, Jessica Huynh<sup>1</sup>, Rachelle Kim<sup>1</sup>,  
Osagie H. Omoruyi<sup>1</sup>, Adriana P. Pantoja<sup>1</sup>, Jun Sang Park<sup>1</sup>, Julia K. Peng<sup>1</sup>, Samantha D. Splitt<sup>1</sup>, Mason Y.  
Tian<sup>1</sup>, and Douglas D. Risser<sup>1\*</sup>

**-Supplementary material-**

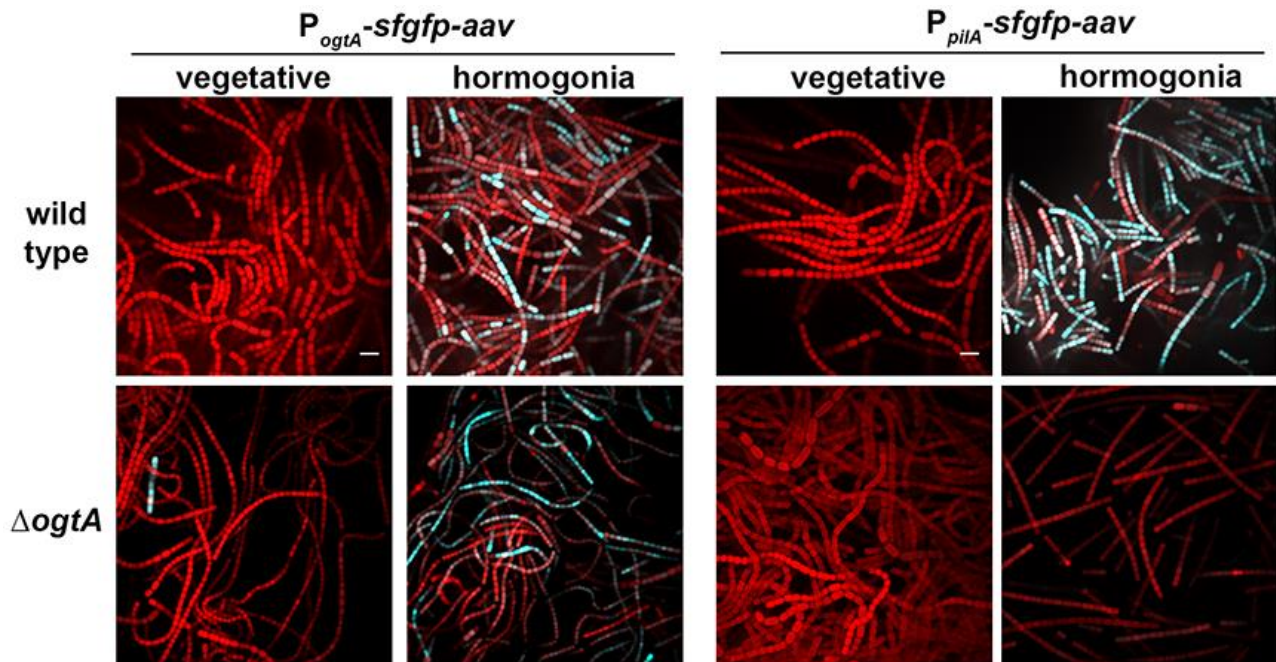

**Figure S1.** Merged images of fluorescence micrographs for cellular autofluorescence (red) or *sfgfp-aav* derived fluorescence (cyan) for vegetative filaments (0 h post induction) and hormogonia (24 h post-induction) of the wild-type and  $\Delta ogtA$  strains harboring  $P_{ogtA}$ -*sfgfp-aav* (pBK111), or  $P_{pilA}$ -*sfgfp-aav* (pBK109) (as indicated). Bar = 10  $\mu$ m.

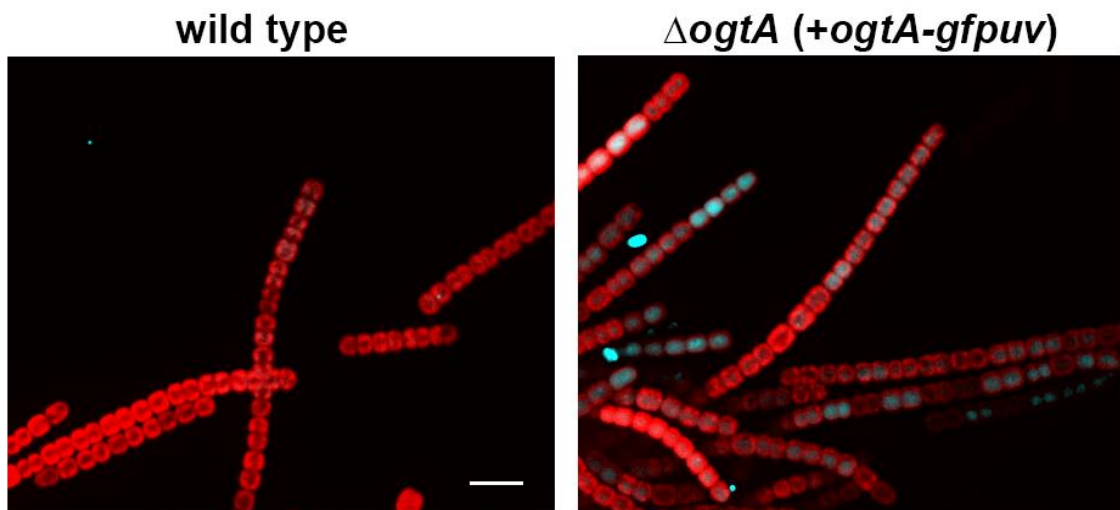

**Figure S2.** Merged images of fluorescence micrographs for cellular autofluorescence (red) or *gfpuv* derived fluorescence (cyan) from hormogonia of the wild-type strain, or the  $\Delta ogtA$  strain harboring a plasmid (pDDR338) expressing an *ogtA-gfpuv* translational fusion from the *petE* promoter. Bar = 10  $\mu$ m.

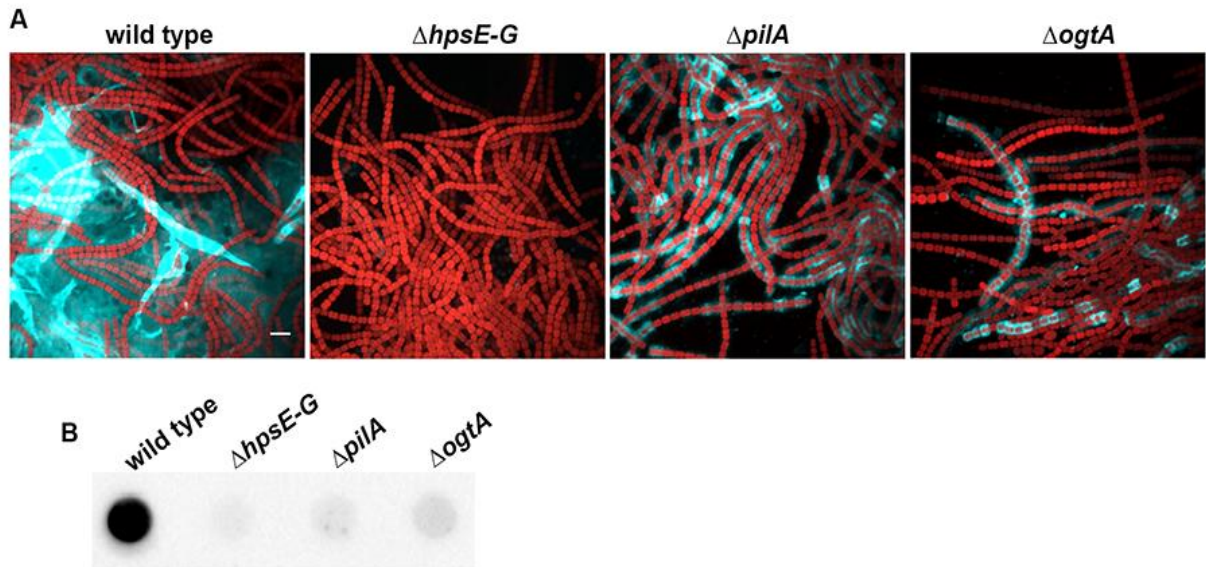

**Figure S3.** Analysis of surface associated and soluble HPS in the wild-type,  $\Delta hpsE-G$ ,  $\Delta pilA$ , or  $\Delta ogtA$  strains. **A.** Merged images of fluorescence micrographs for cellular autofluorescence (red) or UEA-fluorescein derived fluorescence (cyan) from hormogonia of various strains (as indicated). Bar = 10  $\mu$ m. **B.** Image of a single biological replicate for lectin blot analysis of soluble hormogonium polysaccharide from various strains (as indicated).

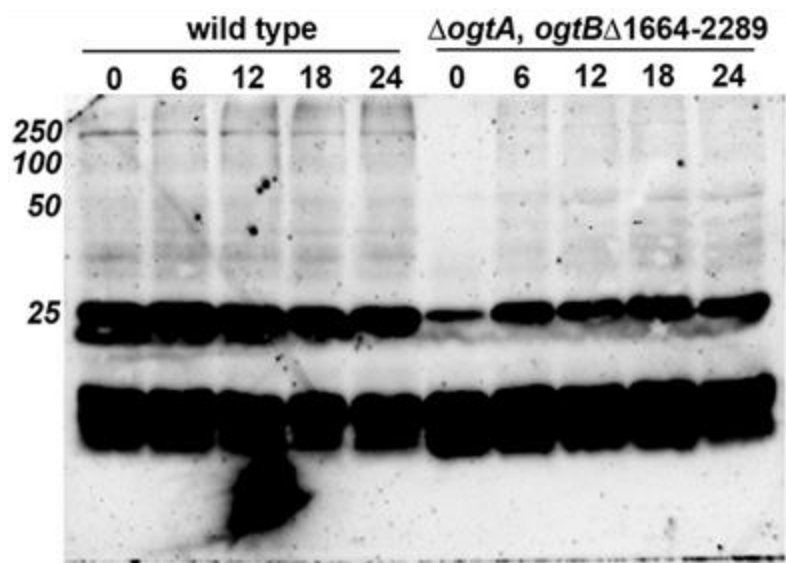

**Figure S4.** Detection of O-GlcNAcylated proteins by sWGA lectin blot. Whole cell protein extracts from strains (as indicated) over the time course of hormogonium development (as indicated in h) were separated by SDS-PAGE (12%) and probed via lectin blot analysis with succinylated wheat germ agglutinin (sWGA). Size of molecular weight marker (kDa) indicated on the left.

**Table S1. Strains and plasmids used in this study**

| Strains                           | Relevant Characteristic(s)                                                                                                                          | source     |
|-----------------------------------|-----------------------------------------------------------------------------------------------------------------------------------------------------|------------|
| <i>Nostoc punctiforme</i> strains |                                                                                                                                                     |            |
| ATCC 29133                        | wild type                                                                                                                                           | ATCC       |
| UCD153                            | Laboratory derivative of <i>N. punctiforme</i> ATCC 29133 with reduced motility                                                                     | (1)        |
| UCD543                            | $\Delta hmpD$ (NpF5963) *                                                                                                                           | (2)        |
| UCD574                            | $\Delta hpsE-G$ (NpF0070-72)                                                                                                                        | (2)        |
| UCD618                            | $\Delta pilA$ (NpF0676)                                                                                                                             | (3)        |
| TNM103                            | UCD153 with a Tn5-1063 insertion after nucleotide 1782 of <i>ogtA</i> (NpF0677)                                                                     | This study |
| TNM428                            | UCD153 with a Tn5-1063 insertion after nucleotide 556 of <i>ogtA</i> (NpF0677)                                                                      | This study |
| UOP102                            | <i>ogtA-gfp</i> (NpF0677)                                                                                                                           | This study |
| UOP106                            | $\Delta ogtA$ (NpF0677)                                                                                                                             | This study |
| UOP121                            | <i>ogtB</i> $\Delta$ 1664-2289 (NpR0678)                                                                                                            | This study |
| UOP122                            | $\Delta ogtA$ , <i>ogtB</i> $\Delta$ 1664-2289                                                                                                      | This study |
| Plasmids                          |                                                                                                                                                     |            |
| pAM504                            | Mobilizable shuttle vector                                                                                                                          | (4)        |
| pRL278                            | Mobilizable suicide vector                                                                                                                          | (5)        |
| pET28a                            | Protein expression vector                                                                                                                           | Novagen    |
| pSCR569                           | Mobilizable suicide vector for C-terminal <i>gfpuv</i> translational fusions                                                                        | (6)        |
| pRL1063a                          | Suicide vector carrying Tn5-1063, a Tn5 derivative transposon                                                                                       | (7)        |
| pDDR355                           | Suicide vector for in-frame deletion of <i>ogtA</i> (NpF0677) [1-4]†                                                                                | This study |
| pDDR360                           | Suicide vector for allelic substitution of <i>ogtA</i> (NpF0677) with <i>ogtA-gfp</i> [5-7, 4]                                                      | This study |
| pBK100                            | Suicide vector for in-frame deletion of nucleotides 4,992-6,870, coding for the OGT domain (amino acids 1664-2289) of <i>ogtB</i> (NpF0678) [10-13] | This study |
| pDDR387                           | Shuttle vector containing <i>ogtA</i> under the control of the <i>petE</i> promoter [8-9]                                                           | This study |
| pDDR388                           | Shuttle vector containing <i>ogtA-gfp</i> under the control of the <i>petE</i> promoter [6,8]                                                       | This study |
| pBK109                            | Shuttle vector containing <i>PpilA-sfgfp-aav</i> transcriptional reporter [16-19]                                                                   | This study |
| pBK111                            | Shuttle vector containing <i>PogtA-sfgfp-aav</i> transcriptional reporter [16-17,20-21]                                                             | This study |
| pBK112                            | Shuttle vector containing <i>ogtA</i> and the 119 bp 5' intergenic region [9, 20]                                                                   | This study |

pDDR116 Protein expression vector containing *hmpD* (NpF5963) nucleotides 1-1,497, This study  
encoding amino acids 1-499 of HmpD [14-15]

\* locus tag denoted in parentheses

† numbers in brackets correspond to primers used to construct plasmid. Detailed information on primers can be found  
in Table S2

**Table S2. Oligonucleotides used in this study**

| Oligonucleotide     | Sequence                                        | Number |
|---------------------|-------------------------------------------------|--------|
| NpF0677-5'-F        | ATATAGGATCCCCGAGATTAGAGAGTATGAAATTG             | 1      |
| NpF0677-5'-R        | CTTATTTTTTCTCAGAAGTCATAGTCAAGAATTTTCAG          | 2      |
| NpF0677-3'-F        | CTATGACTTCTGAGAAAAATAAGTTAGTTGTGAGG             | 3      |
| NpF0677-3'-R        | ATATAGAGCTCTGGCTTGGGGACATCCTGTG                 | 4      |
| NpF0677-gfp-BamHI-F | ATATAGGATCCATTTATAGTGACGACATTGCTG               | 5      |
| NpF0677-gfp-SmaI-R  | ATATACCCGGGATTTTTTCTCAATATAACCTTTGCCAC          | 6      |
| NpF0677-gfp-SpeI-F  | ATATAACTAGTGTTAGTTGTGAGGGCTTCAGC                | 7      |
| NpF0677-BamHI-F     | ATATAGGATCCATGACTTCTGTCCAAATTCCTAATG            | 8      |
| NpF0677-SacI-R      | ATATAGAGCTCTTATTTTTTCTCAATATAACCTTTGCCAC        | 9      |
| NpR0678-OGT-5'-F    | ATATAGGATCCTCCTGTGATTACTTGTCTTAATG              | 10     |
| NpF0678-OGT-5'-R    | CATTTTCAGTGCTTTAGTAGTAGATTCATCGCCAC             | 11     |
| NpF0678-OGT-3'-F    | CTACTACTAAAGCACTGAAATGCTTAAATTTGTAATTAC         | 12     |
| NpF0678-OGT-3'-R    | ATATAGAGCTCGGAATACCAGCAGTTGATTAC                | 13     |
| NpF5963-NcoI-F2     | ATATACCATGGGCAAATTGGAGGAGGAAATGG                | 14     |
| NpF5963-499-XhoI-R  | ATATACTCGAGTTCTAGTTTTCGAGACATCTGTTTTG           | 15     |
| sfGFP-5'-F          | ATGAGCAAAGGAGAAGAACTTTTC                        | 16     |
| sfGFP-AAV-3'-R      | ATATAGAGCTCTTAAACAGCAGCTTTGTAAAGCTCATCCATGCCATG | 17     |
| PpilA-BamHI-F       | ATATAGGATCCAAGCTAACCTCATATTTGATACC              | 18     |
| PpilA-sfGFP-3'-R    | GTTCTTCTCCTTTGCTCATAAGTGTTTTTCTGGGGTAG          | 19     |
| PogtA-5'-F          | ATATAGGATCCCAACTTGAGTTCTATATCTAATTGC            | 20     |
| PogtA-sfGFP-3'-R    | GTTCTTCTCCTTTGCTCATAGTCAAGAATTTTCAGGATAG        | 21     |
| qNpF0677-F2         | TGCGGCAAATAAAGTAGCA                             | 22     |
| qNpF0677-R2         | TCCTCGCTGGATTAGGTGTT                            | 23     |

|                |                       |    |
|----------------|-----------------------|----|
| qpilA-F2       | TCTGGTTGCCAACAATGGTA  | 24 |
| qpilA-R2       | ACTTCAGCACTCCGATCACC  | 25 |
| qNpun_r018_F1  | TAAGAGCGCACCAGCAGTAT  | 26 |
| qNpun_r018_R1  | CATTGAGCGGAAGTGGTAAA  | 27 |
| Tn5-seq-F      | CGATGAAGAGCAGAAGTTATC | 28 |
| Tn5-seq-R      | GGCTCTATTCAGGATAAATC  | 29 |
| Tn5-seq-F-nest | CGTTACCATGTTAGGAGGTC  | 30 |

1. **Campbell, E. L., M. L. Summers, H. Christman, M. E. Martin, and J. C. Meeks.** 2007. Global gene expression patterns of *Nostoc punctiforme* in steady-state dinitrogen-grown heterocyst-containing cultures and at single time points during the differentiation of akinetes and hormogonia. *J. Bacteriol.* **189**:5247-5256. <http://dx.doi.org/JB.00360-07> [pii].
2. **Risser, D. D., and J. C. Meeks.** 2013. Comparative transcriptomics with a motility-deficient mutant leads to identification of a novel polysaccharide secretion system in *Nostoc punctiforme*. *Mol. Microbiol.* **87**:884-893. <http://dx.doi.org/10.1111/mmi.12138>.
3. **Khayatan, B., J. C. Meeks, and D. D. Risser.** 2015. Evidence that a modified type IV pilus-like system powers gliding motility and polysaccharide secretion in filamentous cyanobacteria. *Mol. Microbiol.* **98**:1021-1036. <http://dx.doi.org/10.1111/mmi.13205>.
4. **Wei, T. F., T. S. Ramasubramanian, and J. W. Golden.** 1994. *Anabaena* sp. strain PCC 7120 *ntcA* gene required for growth on nitrate and heterocyst development. *J. Bacteriol.* **176**:4473-4482.
5. **Cai, Y. P., and C. P. Wolk.** 1990. Use of a conditionally lethal gene in *Anabaena* sp. strain PCC 7120 to select for double recombinants and to entrap insertion sequences. *J. Bacteriol.* **172**:3138-3145.
6. **Risser, D. D., F. C. Wong, and J. C. Meeks.** 2012. Biased inheritance of the protein PatN frees vegetative cells to initiate patterned heterocyst differentiation. *Proc. Natl. Acad. Sci. U. S. A.* **109**:15342-15347. <http://dx.doi.org/1207530109> [pii].
7. **Wolk, C. P., Y. Cai, and J. M. Panoff.** 1991. Use of a transposon with luciferase as a reporter to identify environmentally responsive genes in a cyanobacterium. *Proceedings of the National Academy of Sciences.* **88**:5355-5359. <http://dx.doi.org/10.1073/pnas.88.12.5355>.
